# Supplementary material for: Strong carbon – noble gas covalent bond and fluxionality in hypercoordinate compounds
Source: Royal Society of Chemistry journal article supplement (doi:10.1039/d3cp03576j), 2023-01-01
Supplement: d3cp03576j1.pdf [file d3cp03576j1.pdf]

## Strong Carbon – Noble Gas Covalent Bond and Fluxionality in Hypercoordinate

### Compounds

Alejandro Vásquez-Espinal<sup>1</sup>; Ricardo Pino-Rios\*<sup>1,2</sup>

<sup>1</sup>Química y Farmacia, Facultad de Ciencias de la Salud, Universidad Arturo Prat. Casilla 121, Iquique 1100000, Chile. rpinorios@unap.cl.

<sup>2</sup>Instituto de Estudios de la Salud, Universidad Arturo Prat. Iquique, 1100000. Chile.

### SUPPORTING INFORMATION

**Table S1.** Vibrational modes (in  $\text{cm}^{-1}$ ) computed at the CCSD(T)/def2-TZVP level.

| $\nu$ | $\text{CH}_4\text{He}^{2+}$ | $\text{CH}_4\text{Ne}^{2+}$ | $\text{CH}_4\text{Ar}^{2+}$ | $\text{CH}_4\text{Kr}^{2+}$ | $\text{CH}_4\text{Xe}^{2+}$ | $\text{CH}_4\text{Rn}^{2+}$ |
|-------|-----------------------------|-----------------------------|-----------------------------|-----------------------------|-----------------------------|-----------------------------|
| 1     | 712.6079                    | 420.3711                    | 606.9756                    | 557.2035                    | 516.3135                    | 445.7527                    |
| 2     | 909.1061                    | 720.8941                    | 787.9108                    | 696.9451                    | 545.4223                    | 489.8312                    |
| 3     | 923.4879                    | 815.2974                    | 801.0899                    | 774.6904                    | 738.113                     | 716.984                     |
| 4     | 1055.8543                   | 969.2108                    | 911.853                     | 867.7708                    | 815.6047                    | 782.4142                    |
| 5     | 1060.3472                   | 995.9897                    | 1022.6994                   | 1020.677                    | 997.4863                    | 987.958                     |
| 6     | 1213.7408                   | 1154.3162                   | 1251.2854                   | 1246.1762                   | 1238.2602                   | 1229.0865                   |
| 7     | 1272.5143                   | 1198.1464                   | 1279.533                    | 1281.9632                   | 1288.9217                   | 1287.2196                   |
| 8     | 1500.7985                   | 1536.715                    | 1545.2365                   | 1552.1084                   | 1551.7349                   | 1553.9434                   |
| 9     | 1893.3463                   | 1824.375                    | 2068.5309                   | 2126.4268                   | 2208.5027                   | 2242.59                     |
| 10    | 2352.7944                   | 2383.5884                   | 2503.0562                   | 2542.6227                   | 2576.5237                   | 2596.3457                   |
| 11    | 2796.8171                   | 2813.9623                   | 2909.8044                   | 2932.0994                   | 2955.3932                   | 2968.4924                   |
| 12    | 2870.2891                   | 2913.6744                   | 2965.5511                   | 2982.6324                   | 2996.857                    | 3009.4948                   |

**Table S2.** Moment of Inertia ( $I$ , in  $\text{amu}\cdot\text{\AA}^2$ ) computed at the CCSD(T)/def2-TZVP level.

| $I$ | $\text{CH}_4\text{He}^{2+}$ | $\text{CH}_4\text{Ne}^{2+}$ | $\text{CH}_4\text{Ar}^{2+}$ | $\text{CH}_4\text{Kr}^{2+}$ | $\text{CH}_4\text{Xe}^{2+}$ | $\text{CH}_4\text{Rn}^{2+}$ |
|-----|-----------------------------|-----------------------------|-----------------------------|-----------------------------|-----------------------------|-----------------------------|
| XX  | 7.590424                    | 25.761183                   | 26.545415                   | 33.560320                   | 38.204431                   | 41.914489                   |
| YY  | 78.316797                   | 10.140773                   | 26.776697                   | 36.905488                   | 50.134306                   | 57.782924                   |
| ZZ  | 57.708748                   | 29.707826                   | 41.454371                   | 54.450764                   | 66.382668                   | 74.782079                   |

**Table S3.** Rotational constants ( $B$ , in GHz) computed at the CCSD(T)/def2-TZVP level.

| $B$ | CH <sub>4</sub> He <sup>2+</sup> | CH <sub>4</sub> Ne <sup>2+</sup> | CH <sub>4</sub> Ar <sup>2+</sup> | CH <sub>4</sub> Kr <sup>2+</sup> | CH <sub>4</sub> Xe <sup>2+</sup> | CH <sub>4</sub> Rn <sup>2+</sup> |
|-----|----------------------------------|----------------------------------|----------------------------------|----------------------------------|----------------------------------|----------------------------------|
| XX  | 66.581128                        | 19.617849                        | 19.038279                        | 15.058826                        | 13.228283                        | 12.057382                        |
| YY  | 78.316797                        | 49.83634                         | 18.873837                        | 13.693871                        | 10.080503                        | 8.7461653                        |
| ZZ  | 57.708748                        | 17.011645                        | 12.191212                        | 9.2813943                        | 7.6131169                        | 6.7580229                        |

**Table S4.** IQA Values (in kcal.mol<sup>-1</sup>) for all systems computed at the CCSD(T)/Jorge-TZP/CCSD(T)/def2-TZVP level. Vc: Coulomb (Ionic) contribution; Vx: Exchange (Covalent) contribution.

| Systems                                            | CH <sub>4</sub> He <sup>2+</sup> | CH <sub>4</sub> Ne <sup>2+</sup> | CH <sub>4</sub> Ar <sup>2+</sup> | CH <sub>4</sub> Kr <sup>2+</sup> | CH <sub>4</sub> Xe <sup>2+</sup> | CH <sub>4</sub> Rn <sup>2+</sup> |
|----------------------------------------------------|----------------------------------|----------------------------------|----------------------------------|----------------------------------|----------------------------------|----------------------------------|
| <b>Vc (C - Ng)</b>                                 | -11.3                            | -3.7                             | 4.2                              | -7.0                             | -63.6                            | -83.4                            |
| <b>Vx (C - Ng)</b>                                 | -78.1                            | -61.2                            | -127.9                           | -134.8                           | -134.2                           | -125.9                           |
| <b><math>\Delta E_{\text{int}}</math> (C - Ng)</b> | -89.4                            | -64.9                            | -123.7                           | -141.8                           | -197.8                           | -209.3                           |
| <b>Vc (C - Ha)</b>                                 | -11.9                            | -7.6                             | -11.7                            | -19.3                            | -29.3                            | -29.4                            |
| <b>Vx (C - Ha)</b>                                 | -123.7                           | -125.3                           | -133.9                           | -136.3                           | -139.1                           | -140.6                           |
| <b><math>\Delta E_{\text{int}}</math>(C - Ha)</b>  | -135.6                           | -132.9                           | -145.6                           | -155.7                           | -168.5                           | -170.0                           |
| <b>Vc (C - Hb)</b>                                 | -26.6                            | -18.9                            | -20.1                            | -26.4                            | -36.7                            | -36.8                            |
| <b>Vx (C - Hb)</b>                                 | -94.5                            | -93.6                            | -98.6                            | -100.1                           | -101.8                           | -102.4                           |
| <b><math>\Delta E_{\text{int}}</math>(C - Hb)</b>  | -121.1                           | -112.5                           | -118.7                           | -126.5                           | -138.6                           | -139.2                           |

**Table S5.** Atomic descriptors computed for noble gas atoms at the CCSD(T)/def2-TZVP level.

| Atom | IE    | EA    | Hardness | Softness | Chem Pot | Electrophilicity |
|------|-------|-------|----------|----------|----------|------------------|
| He   | 24.35 | 22.38 | 0.98     | 1.02     | 23.37    | 277.88           |
| Ne   | 21.32 | 20.77 | 0.28     | 3.63     | 21.04    | 803.27           |
| Ar   | 15.54 | 14.77 | 0.38     | 2.60     | 15.15    | 298.33           |
| Kr   | 13.97 | 12.30 | 0.83     | 1.20     | 13.14    | 103.41           |
| Xe   | 12.26 | 8.96  | 1.65     | 0.61     | 10.61    | 34.14            |
| Rn   | 11.53 | 7.27  | 2.13     | 0.47     | 9.40     | 20.75            |

**Table S6.** Activation energies (in kcal.mol<sup>-1</sup>) for the reorganization of C – H bonds in CH<sub>4</sub>Ng<sup>2+</sup> (Ng = He and Ne) at the DFT and CCSD(T) levels.

| System                           | $\Delta E_{\omega B97xD}^{\ddagger}$ | $\Delta E_{CCSD(T)}^{\ddagger}$ |
|----------------------------------|--------------------------------------|---------------------------------|
| CH <sub>4</sub> He <sup>2+</sup> | 0.89                                 | 0.53                            |
| CH <sub>4</sub> Ne <sup>2+</sup> | 1.01                                 | -0.32                           |

**Figure S1.** AdNDP orbitals and occupation numbers (ON, in |e|) for CH<sub>5</sub><sup>+</sup>.

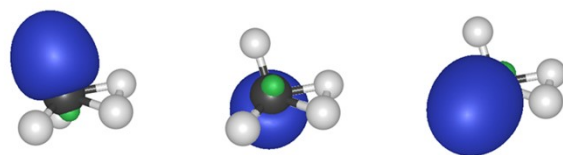

3 x 2c-2e C-H  $\sigma$  bonds

ON : 1.92 - 1.99 |e|

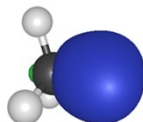

1 x 3c-2e C-H-H  $\sigma$  bonds

ON : 2.00 |e|

## CARTESIAN COORDINATES

| $\text{CH}_4^{2+}$          |              |              |              | $\text{CH}_5^+$             |              |              |              |
|-----------------------------|--------------|--------------|--------------|-----------------------------|--------------|--------------|--------------|
| C                           | 0.126647000  | -0.000167000 | 0.000001000  | C                           | 0.000000000  | 0.000000000  | 0.000000000  |
| H                           | 0.662798000  | 1.003158000  | 0.000023000  | H                           | 0.000000000  | 0.000000000  | 1.100076000  |
| H                           | -1.042305000 | -0.520076000 | 0.000046000  | H                           | 1.013459000  | 0.000000000  | -0.646616000 |
| H                           | 0.660907000  | -1.003898000 | -0.000026000 | H                           | -0.076963000 | 1.054686000  | -0.303390000 |
| H                           | -1.041283000 | 0.521817000  | -0.000047000 | H                           | -0.697201000 | -0.683091000 | -0.476176000 |
| H                           |              |              |              | H                           | 1.054492000  | -0.567857000 | 0.104104000  |
| $\text{CH}_4\text{He}^{2+}$ |              |              |              | $\text{CH}_4\text{Ne}^{2+}$ |              |              |              |
| C                           | 0.078615000  | -0.159801000 | 0.000309000  | C                           | 0.808897454  | -0.134666545 | 0.000156399  |
| H                           | 0.005406000  | -0.745374000 | -0.960755000 | H                           | 0.950507757  | -0.675223105 | -0.975144815 |
| H                           | 0.792866000  | 0.715882000  | 0.523834000  | H                           | 1.051570948  | 0.991533837  | 0.506586895  |
| H                           | 0.005089000  | -0.741900000 | 0.962847000  | H                           | 0.948874673  | -0.669281043 | 0.979041026  |
| He                          | -1.034070000 | 0.508061000  | -0.000929000 | Ne                          | -0.885463020 | 0.017128623  | -0.000080915 |
| H                           | 0.793088000  | 0.714073000  | -0.525924000 | H                           | 1.050292128  | 0.989683346  | -0.510612343 |
| $\text{CH}_4\text{Ar}^{2+}$ |              |              |              | $\text{CH}_4\text{Kr}^{2+}$ |              |              |              |
| C                           | 1.118590871  | -0.119320349 | 0.000135398  | C                           | 1.499856000  | -0.116046000 | 0.000434000  |
| H                           | 1.438186661  | -0.662849528 | -0.919758267 | H                           | 1.846176000  | -0.647757000 | -0.914235000 |
| H                           | 1.538181830  | 0.923496380  | 0.498694014  | H                           | 1.936914000  | 0.912512000  | 0.498225000  |
| H                           | 1.438078402  | -0.660121032 | 0.921654113  | H                           | 1.848017000  | -0.659329000 | 0.907210000  |
| Ar                          | -0.703634775 | 0.010752954  | -0.000031157 | Kr                          | -0.460486000 | 0.004995000  | -0.000045000 |
| H                           | 1.539433806  | 0.921843114  | -0.500841428 | H                           | 1.947258000  | 0.911022000  | -0.492170000 |
| $\text{CH}_4\text{Xe}^{2+}$ |              |              |              | $\text{CH}_4\text{Rn}^{2+}$ |              |              |              |
| C                           | 1.777143745  | -0.109820462 | 0.000550862  | C                           | 1.980373415  | -0.107864824 | 0.000462408  |
| H                           | 2.158980278  | -0.646702129 | -0.894196307 | H                           | 2.367632851  | -0.642437505 | -0.891653610 |
| H                           | 2.248650215  | 0.895446255  | 0.492526976  | H                           | 2.465926170  | 0.886986357  | 0.491559100  |
| H                           | 2.158998953  | -0.646486193 | 0.895003239  | H                           | 2.369680201  | -0.644792069 | 0.889976452  |
| Xe                          | -0.360854183 | 0.003078089  | -0.000039472 | Rn                          | -0.250664913 | 0.001902845  | -0.000009423 |
| H                           | 2.256633981  | 0.890448017  | -0.494507608 | H                           | 2.471702833  | 0.883787486  | -0.491846028 |
